# Supplementary material for: Analysis of gene duplication within the Arabidopsis NUCLEAR FACTOR Y, subunit B (NF-YB) protein family reveals domains under both purifying and diversifying selection
Source: PubMed Central journal article supplement (PMC10396019; doi:10.1371/journal.pone.0289332), 2023-08-02
Supplement: pone.0289332.s008.pdf [file pone.0289332.s008.pdf]

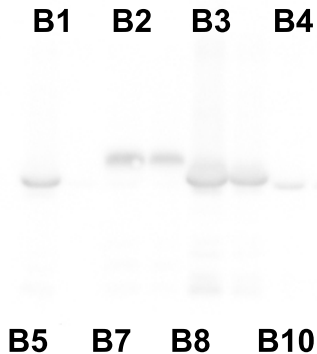

**Original image for Fig 2D. The Western blot was visualized on the Bio-Rad ChemiDoc XRS imaging system.**
